# Supplementary material for: Supported Pd nanoclusters with enhanced hydrogen spillover for NOx removal via H2-SCR: the elimination of “volcano-type” behaviour
Source: Royal Society of Chemistry journal article supplement (doi:10.1039/c7cc02235b), 2017-01-01
Supplement: c7cc02235b1.pdf [file c7cc02235b1.pdf]

# Supported Pd nanoclusters with enhanced hydrogen spillover for NO<sub>x</sub> removal via H<sub>2</sub>-SCR: The elimination of “volcano-type” behaviour

Zhezhe Peng, Zongyuan Li, Yunquan Liu\*, Shuai Yan, Jianing Tong, Duo Wang, Yueyuan Ye, Shuirong Li\*

*College of Energy, Collaborative Innovation Center of Chemistry for Energy Materials (iChEM), Xiamen University, Xiamen 361102, China.*

\*Corresponding authors: [sli@xmu.edu.cn](mailto:sli@xmu.edu.cn), [yq\\_liu@xmu.edu.cn](mailto:yq_liu@xmu.edu.cn), FAX: +86-592-2188053

## Supporting information

### 1. Experimental Section

#### 1.1 Catalysts preparation

The CeZrO<sub>4</sub> and Al-CeZrO<sub>4</sub> support oxides with a ratio of Ce:Zr = 0.5:0.5 or Al:Ce:Zr = 0.1:0.45:0.45 were prepared using a co-precipitation method. Briefly, appropriate amount of Ce(NO<sub>3</sub>)<sub>3</sub>·6H<sub>2</sub>O, ZrOCl<sub>2</sub>·8H<sub>2</sub>O, Al(NO<sub>3</sub>)<sub>3</sub>·9H<sub>2</sub>O as precursors and PEG as surfactant were dissolved in an ethanol solution at 50 °C in a water bath. Ammonium hydroxide was added dropwise until the pH ≥ 10. After washing, the samples were dried in a vacuum oven at 80 °C for 12 h and calcined in a muffle oven at 500 °C for 4 h, yielding the CeZrO<sub>4</sub> and Al-CeZrO<sub>4</sub> support oxides. The 1wt.%Pd/CeZrO<sub>4</sub> and 1wt.%Pd/Al-CeZrO<sub>4</sub> catalysts were provided by wet incipient impregnation method. The as-prepared support oxide was impregnated with a suitable volume of Pd(NO<sub>3</sub>)<sub>2</sub>·2H<sub>2</sub>O solution containing desired amount of Pd and kept overnight at room temperature. After thermal treating at the same conditions for the preparation of support oxides, the Pd catalysts were molded and crushed to 20-40 meshes for use. XRF analysis of the as-prepared samples showed that the errors of mass loading amounts of Pd, Al, Ce, Zr are less than 5%.

#### 1.2 Catalysts characterization

The specific surface area (SSA) of the as-prepared materials was determined by nitrogen adsorption at 77 K using the Brunauer–Emmett–Teller (BET) method (Micrometrics ASAP2020). All samples were outgassed at 150 °C for 1 h prior to analysis. The pore-size distribution was determined from the desorption branch of a fully recorded isotherm of the as-prepared powders by the Barrett, Joyner and Halenda (BJH) method.

The phase composition and the crystal structure of the as-prepared powders were determined from powder X-ray diffraction patterns by using a Rigaku D/Max-IV X-ray diffractometer employing Cu K $\alpha$  radiation operated at 40 kV and 40 mA. Data were collected over the 2 $\theta$  range from 20 ° to 80 ° at a scan rate of 1 ° min<sup>-1</sup>. Rietveld refinement was conducted using the PDXL program (Rigaku Corporation, PDXL 2.1).

Raman analysis (IDSpec ARCTIC Raman Spectrometer) was carried with the excitation wavelength is 532 nm and the power is 1.5 mW.

Transmission electron microscopy (TEM) and high resolution transmission electron microscopy (HRTEM)

images were recorded on a JEM-2010 and a JEM-2100F, respectively, at 200 kV, and the sample to be measured was first dispersed in ethanol and then collected on copper grids covered with carbon film.

H<sub>2</sub> and CO adsorption isotherm measurements (Micromeritics ASAP2020) were measured at 0 °C and 0 ~ 1 atm after degassed in vacuo at 350 °C for 4 h and cooled to 0 °C while degassing. CO and H<sub>2</sub> Pulse Chemisorption (Micromeritics AutoChem II 2920) used a certain amount of 10% H<sub>2</sub>/Ar gas to test the volume of H<sub>2</sub> adsorbed after the samples were retreated in Ar atmosphere at 300 °C for 1 h and cooled down to 0 °C. The palladium dispersions and hydrogen spillover are evaluated by the following equation:

$$D = \frac{2V_0 \times M_{Pd}}{22414W \times P}$$

where W is mass of the sample (g), P is mass fraction of Pd (%) and M<sub>Pd</sub> represents molar weight of Pd (106.4 g mol<sup>-1</sup>). For the calculation of palladium metal dispersion, V<sub>0</sub> depicts the volume of CO chemisorption (mL), and V<sub>0</sub> depicts the difference between the volume of chemisorbed H<sub>2</sub> and CO (mL) when counting the value of hydrogen spillover.

H<sub>2</sub>-TPD (Micromeritics AutoChem II 2920) was proceeded after the catalysts being saturated with H<sub>2</sub> and purged in pure Ar at 0 °C at a heating rate of 10 °C min<sup>-1</sup> to 500 °C while recording the concentration profile of desorbed hydrogen.

XPS (AXIS-HSi, Kratos Analytical) analysis was conducted using a monochromatized Al K $\alpha$  exciting radiation ( $h\nu = 1286.71$  eV) with a constant analyzer-pass-energy of 40.0 eV. All binding energies (BEs) were referenced to C 1s peak (BE set at 284.5 eV) arising from C–C bonds.

### 1.3 Catalytic performance studies

The evaluation of the selective catalytic reduction of NO by hydrogen of the catalysts were carried out in a tubular reactor with an inner diameter of 0.8 cm at a GHSV of ~60,000 h<sup>-1</sup>. A 0.5 g sample of the catalyst was placed in the reactor, connected to a gas chromatograph (Shimadzu GC 2010 plus, equipped with TCD, Japan) and a NO/NO<sub>2</sub> analyzer (Testo 340, Germany) to measure the gas-phase composition in the reactor outlet. The reaction feed gas mixture consisted of 1000 ppm NO<sub>x</sub> (NO: NO<sub>2</sub> ratio ~ 9: 1), 1 vol.% H<sub>2</sub>, 5 vol.% O<sub>2</sub> and Ar as balance gas. The reaction temperature was increased from 80 to 300 °C and the activity data were collected when the reaction reached steady-state condition at each temperature. The performances of catalysts were evaluated by means of NO<sub>x</sub> conversion as described by the following equation:

$$\text{NO}_x \text{ conv. \%} = \frac{c(\text{NO}_x)_{in} - c(\text{NO}_x)_{out}}{c(\text{NO}_x)_{in}} \times 100\%$$

## 2. Supporting Figures and Tables

### 2.1 N<sub>2</sub> sorption isotherms and pore size distribution

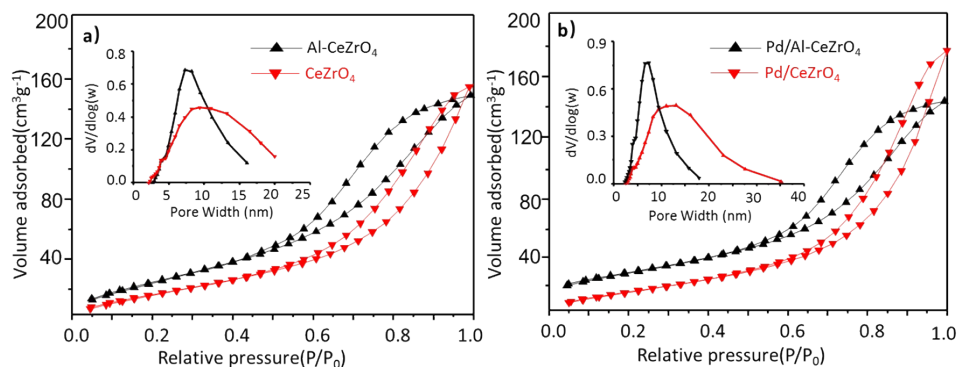

Figure S1 N<sub>2</sub> sorption isotherms and pore size distributions of CeZrO<sub>4</sub>, Al-CeZrO<sub>4</sub>, Pd/CeZrO<sub>4</sub> and Pd/Al-CeZrO<sub>4</sub>.

## 2.2 Raman analysis

Raman spectra of supported Pd catalysts were shown in Figure S2. Note that six Raman active modes of  $A_{1g} + 3E_g + 2B_{1g}$  symmetry are observed for tetragonal  $ZrO_2$  (space group  $P42/nmc$ ), while for the cubic fluorite structure (space group  $Fm3m$ ) only one  $F_{2g}$  mode centered at around  $490\text{ cm}^{-1}$  is Raman-active. In pure  $CeO_2$ , which also has the fluorite structure, the  $F_{2g}$  mode is observed at  $465\text{ cm}^{-1}$ .

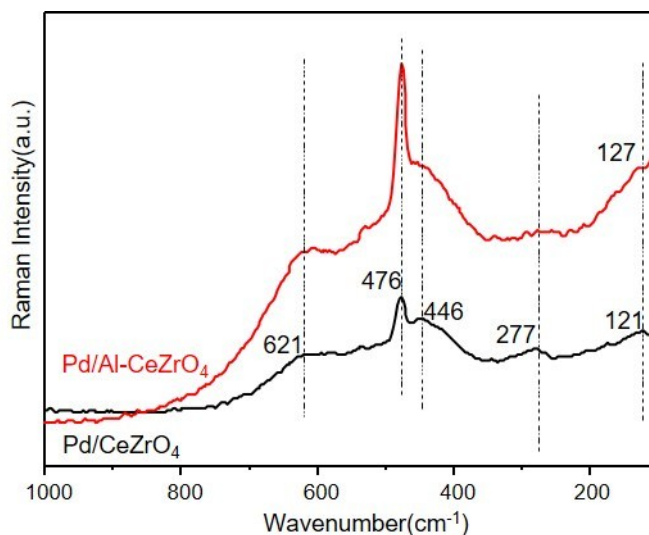

Figure S2 Raman spectra of as-prepared  $CeZrO_4$  and  $Al-CeZrO_4$  supported Pd catalysts.

## 2.3 HRTEM and EDX analysis

HRTEM images of as prepared Pd catalysts were put on Figure S3 a~d) in case the picture in the paper is not clear enough. Measurement of lattice fringe spacing based on the HRTEM images were also shown in Figure S3 e~f).

Element mappings and Energy Dispersive X-Ray (EDX) analysis were carried out, as shown in Figure S4 a~g). All elements examined including Pd could be obviously identified, which are homogeneously distributed over the selected area of the Pd/Al-CeZrO<sub>4</sub> catalyst. Note that the element mapping was done within a relatively large area (that is, under relatively low magnification). This is because that the Pd loading was very low (1 wt%) and the as-deposited Pd nanoclusters are very small in size, which consequently gives very weak signals and lead to severe drifts when conducted under relatively high magnifications.

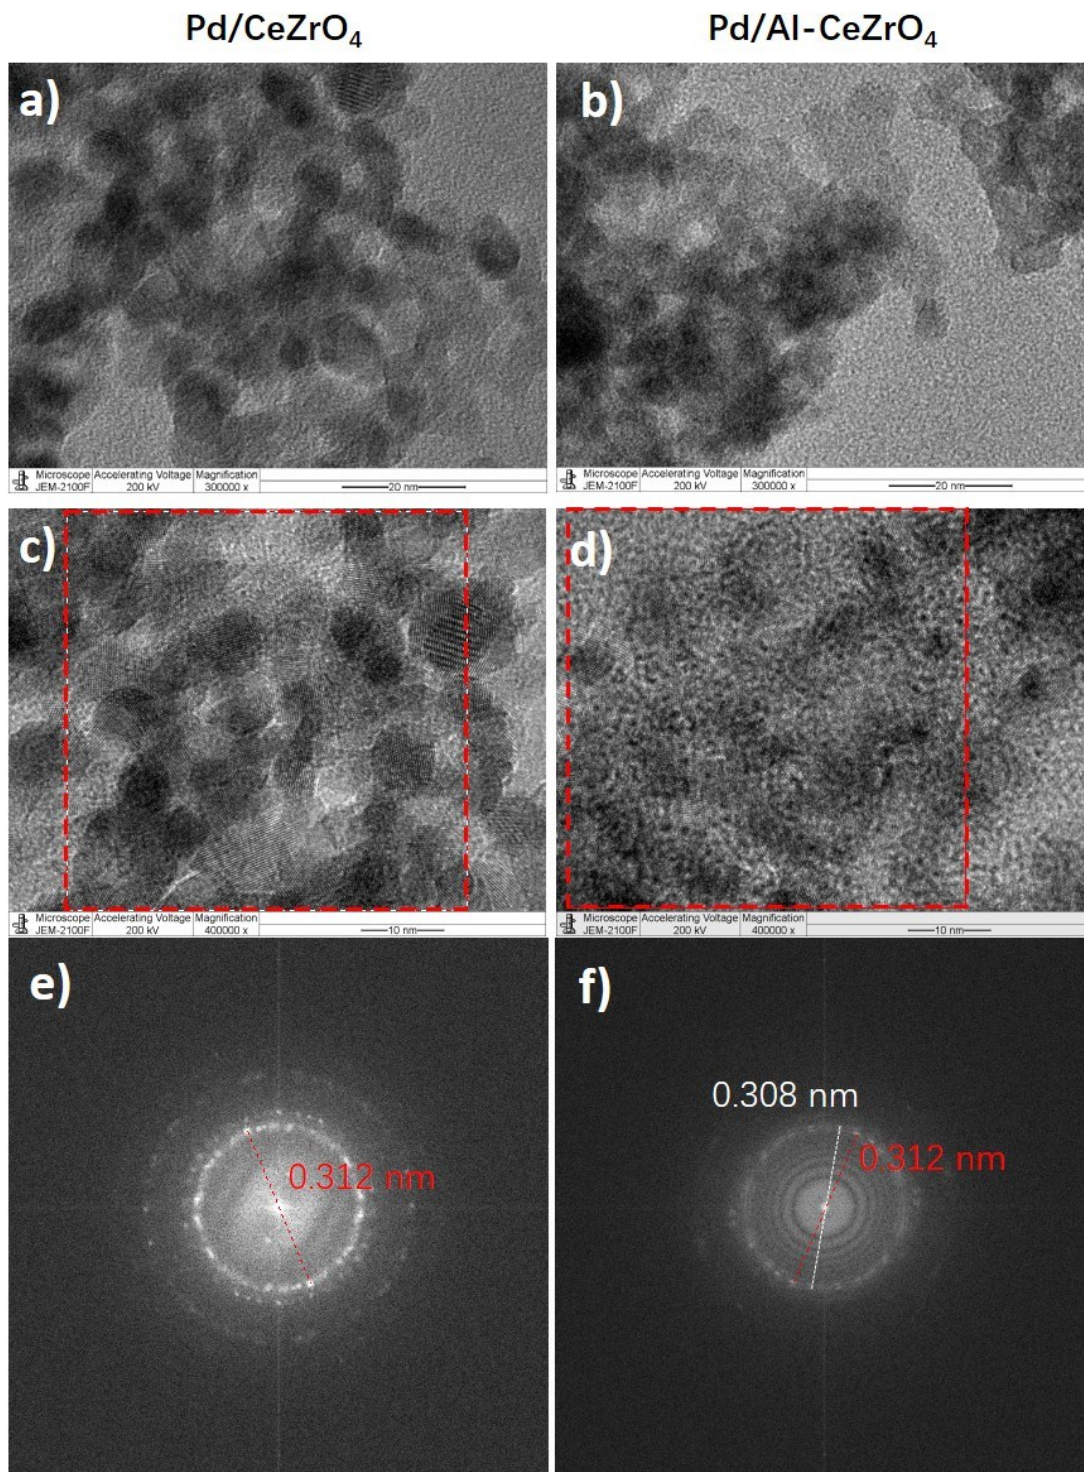

Figure S3 a~d) HRTEM images and e~f) Measurement of lattice fringe spacing based on the HRTEM images of the as prepared Pd catalysts.

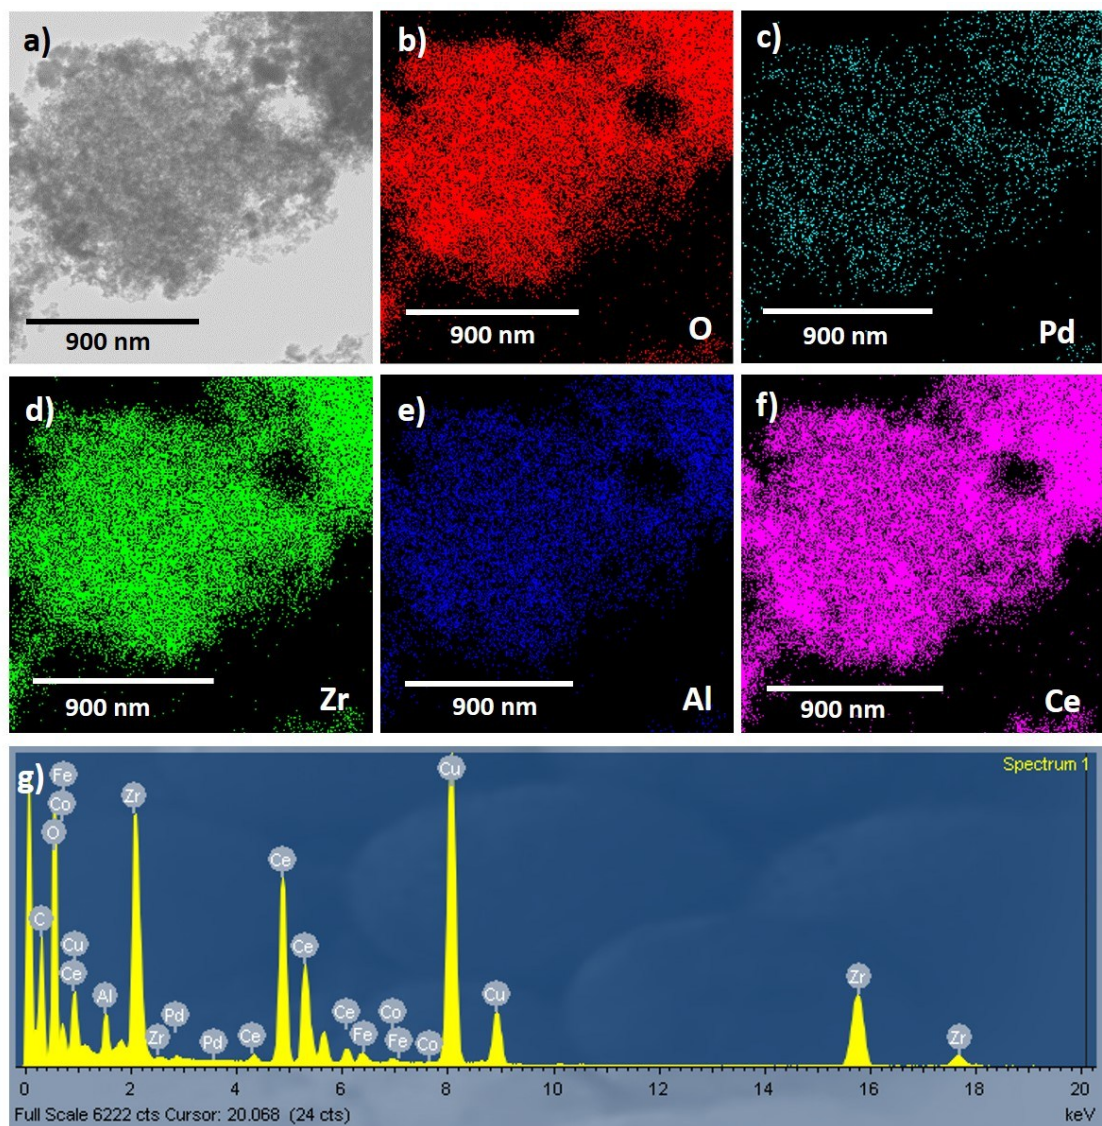

Figure S4 a~g) Element maps and EDX spectroscopy from a randomly region of Pd/Al-CeZrO<sub>4</sub> catalyst.

## 2.4 XPS analysis

Table S1 listed the binding energy (B.E.) and integral area (IA) of each peak in the Ce 3d XPS spectra of as-prepared Pd/CeZrO<sub>4</sub> and Pd/Al-CeZrO<sub>4</sub> catalysts.

Table S1 Peak information of Ce 3d XPS spectra of as-prepared Pd catalysts

| Sample                   |           | v     | v'    | v''   | v'''  | u     | u'    | u''   | u'''  |
|--------------------------|-----------|-------|-------|-------|-------|-------|-------|-------|-------|
| Pd/CeZrO <sub>4</sub>    | B.E., eV  | 882.3 | 884.3 | 888.8 | 898.2 | 900.8 | 902.3 | 907.6 | 916.6 |
|                          | I.A, a.u. | 20144 | 12728 | 8962  | 21254 | 13437 | 3466  | 7604  | 17753 |
| Pd/Al-CeZrO <sub>4</sub> | B.E., eV  | 882.1 | 884.2 | 888.5 | 898.1 | 900.5 | 902.6 | 907.4 | 916.5 |
|                          | I.A, a.u. | 15443 | 19522 | 8809  | 17107 | 15024 | 6943  | 6648  | 16451 |
